# Supplementary material for: Optical microscopic study of surface morphology and filtering efficiency of face masks
Source: PeerJ. 2019 Jun 26;7:e7142. doi: 10.7717/peerj.7142 (PMC6599448; doi:10.7717/peerj.7142)
Supplement: Supplemental Information 3 [file peerj-07-7142-s003.xlsx]

## Sheet: Sheet1
	Filtering efficiency in %
Mask Type	Measurment 1	Measurment 2	Measurment 3
Surgical (SM)	92	95.7	95.5							Particle size
Cloth mask 3 (CM3)	76.6	78.3	80							% ABUNDANCE
Cloth mask 7 (CM7)	81.4	84.2	84.5							M1	M2	M3
Cloth mask 9 (CM9)	63.7	61	65						<5 μm	78.8	83	78
Cloth mask 18 (CM18)	72	67	70						5-10μm	16.5	18	19.5
									>10μm	2.4	2.4	1.6
	Filtering efficeincy of CM9 in %after washing and drying cycles
	Measurement 1	Measurment 2	Measurement 3
No washing	62.5	65.7	66.8
cycle 1	59	65	62
cycle 2	56	58	60
cycle 3	50.2	55.2	56
cycle 4	47	52.3	54.7
		Pore size calculation in μm
	Measurments (M)
Cloth mask number (CM)	M1	M2	M3	M4	M5	M6	M7	M8	M9	M10
1	556.6	450	255	360.38	540.07	450	501.7	291.38	442.3	274.8
2	212.769	172.808	287.692	295.115	289.231	242.692	357.385	163.538	198.654	208.538
3	238.154	204	135.269	299.731	252.077	228.5	206.577	291.077	270.769	233.346
4	76.0385	68.0123	45.4615	55.0123	86.5385	135.006	129.008	79.001	68.012	69.3846
5	284.192	349.538	391.885	365.615	416.846	286.846	408.192	320.846	171.423	299.615
6	122.692	151.385	312.885	260.308	166.885	244.231	172.5	277.231	229.077	191.115
7	76.0385	85.002	85.4615	100.05	86.5385	174.385	133.846	89.1538	100	69.3846
8	329.154	333.346	290.577	367.038	358.615	323.192	334.231	268.538	192.308	197.077
9	373.769	441.615	628.308	404.423	405.385	343.423	386.5	438.962	495.962	692
10	385.846	333.808	410.462	387.654	412.462	392.615	410.154	404.538	295.346	424.269
11	346.385	356	428.385	363	346.731	462	479.5	424.385	353.115	372.269
12	320	283.846	307.192	272.769	280.808	288	278.808	267.923	273.077	221.846
13	224.769	314.192	143.346	131.269	220	219.923	230.308	217.808	214.962	228.346
14	360.038	297.231	367.654	429.962	244.308	248.423	404.423	353.923	383.731	314.538
15	268.308	275.077	270.692	239.731	492.846	519.654	472.615	518.462	546.308	406.154
16	310.346	216.846	275.423	259.154	337.231	237.077	283.846	233.615	287.885	288.731
17	258.615	215.385	221.846	205.808	340.192	306.577	223.462	249.923	293.692	280.346
18	378.538	299.038	402.769	401.538	289.5	330.269	490.269	433.577	605.769	432.923
19	222.923	273	275.077	233.308	260.923	240.346	285.038	230.962	271	297.269
20	478.808	369.346	324.769	383.731	436.962	399.192	266.231	269.192	276.385	240.615
					Numbers of pores per image
			cloth Mask no	image 1	image 2	image 3	image 4	image 5
			1	18	16	17	17	17
			2	29	26	24	25	27
			3	30	29	28	30	25
			4	24	25	27	25	24
			5	18	20	20	19	19
			6	26	31	24	36	30
			7	16	17	19	19	14
			8	26	27	30	29	21
			9	19	18	16	16	19
			10	25	25	24	25	24
			11	11	12	12	12	11
			12	39	40	39	34	31
			13	27	28	43	40	39
			14	26	24	28	28	28
			15	68	67	33	31	34
			16	20	19	18	14	18
			17	19	21	34	28	33
			18	29	28	30	11	13
			19	31	31	32	24	31
			20	27	30	29	23	26
